# Supplementary material for: The Arabidopsis transcription factor TCP9 modulates root architectural plasticity, reactive oxygen species‐mediated processes, and tolerance to cyst nematode infections
Source: PubMed Central journal article supplement — Plant J. 2022 Oct 21;112(4):1070–83. doi: 10.1111/tpj.15996 (PMC9828446; doi:10.1111/tpj.15996), 2022-10-21
Supplement: TPJ-112-1070-s002.pdf [file TPJ-112-1070-s002.pdf]

tair10

5.56Kbp

3

9,955,600 9,956,000 9,956,400 9,956,800 9,957,200 9,957,600 9,958,000 9,958,400 9,958,800 9,959,200 9,959,600 9,960,000 9,960,400 9,960,800

Col-0

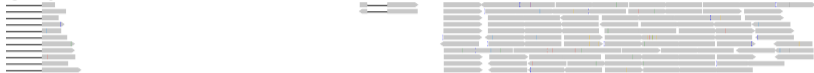

*tcp9*

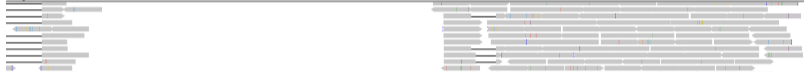

*tcp20*

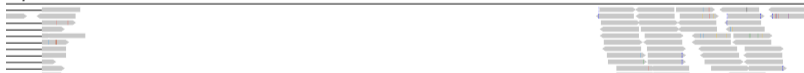

*tcp9tcp20*

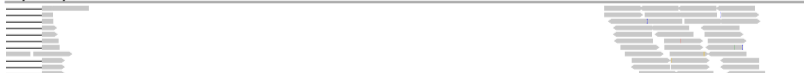

Arabidopsis\_thaliana.TAIR10.44.gff3

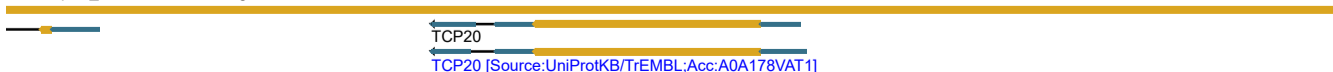

TCP20

TCP20 [Source:UniProtKB/TrEMBL;Acc:A0A178VAT1]
