# Supplementary material for: The Arabidopsis transcription factor TCP9 modulates root architectural plasticity, reactive oxygen species‐mediated processes, and tolerance to cyst nematode infections
Source: PubMed Central journal article supplement — Plant J. 2022 Oct 21;112(4):1070–83. doi: 10.1111/tpj.15996 (PMC9828446; doi:10.1111/tpj.15996), 2022-10-21
Supplement: TPJ-112-1070-s007.pdf [file TPJ-112-1070-s007.pdf]

# Abiotic Stress eFP: AT2G45680 / TCP9

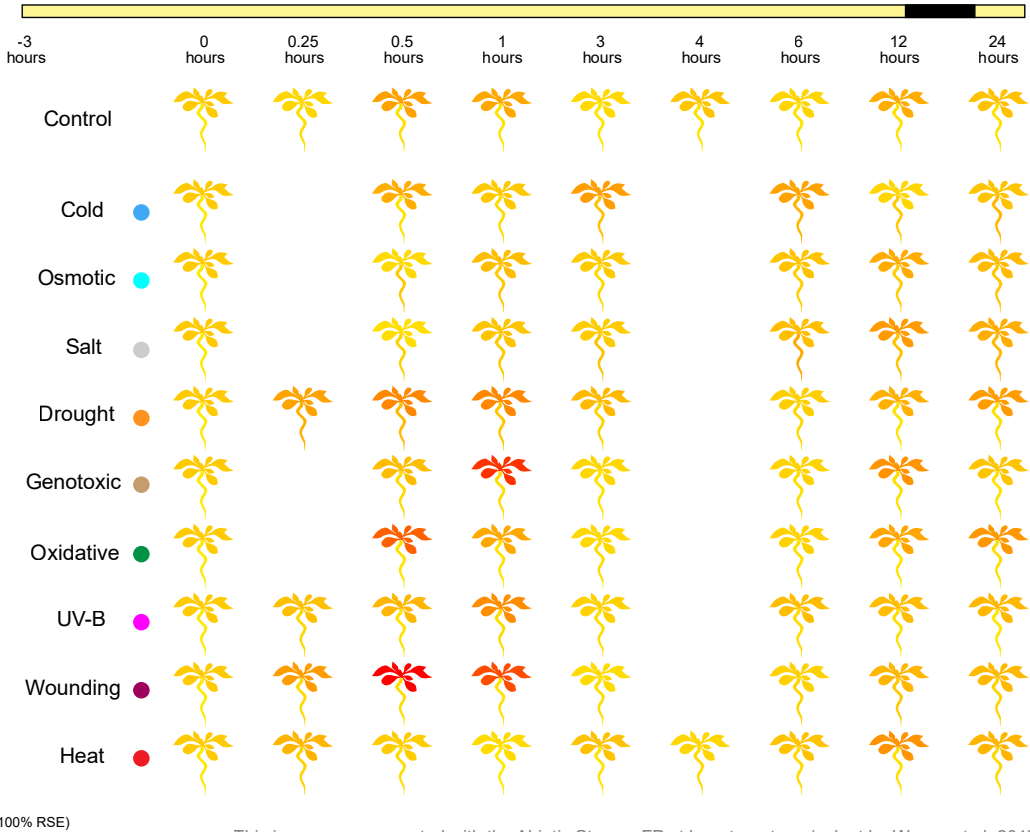

This image was generated with the Abiotic Stress eFP at [bar.utoronto.ca/eplant](http://bar.utoronto.ca/eplant) by Waese et al. 2017
