# Supplementary figures and images for: The Arabidopsis transcription factor TCP9 modulates root architectural plasticity, reactive oxygen species‐mediated processes, and tolerance to cyst nematode infections
Source: PubMed Central journal article supplement — Plant J. 2022 Oct 21;112(4):1070–83. doi: 10.1111/tpj.15996 (PMC9828446; doi:10.1111/tpj.15996), 2022-10-21

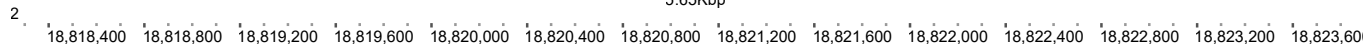

Col-0

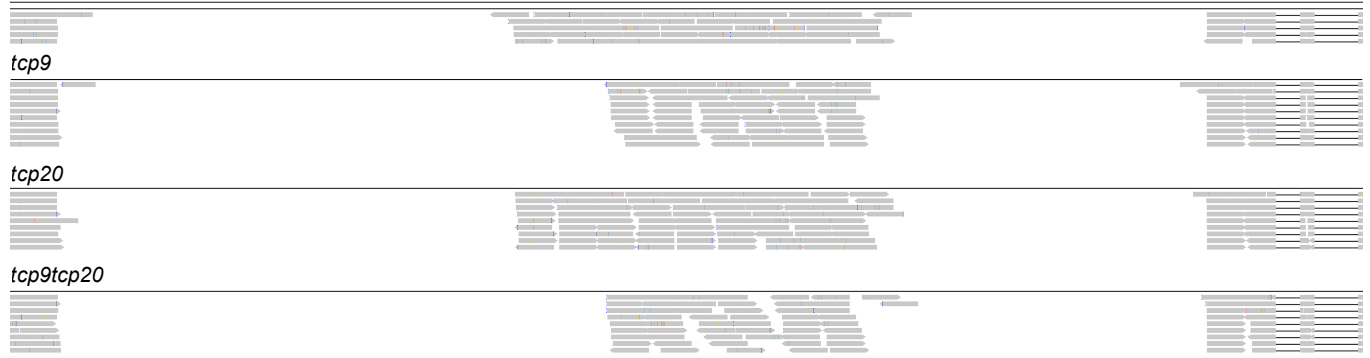

Arabidopsis\_thaliana.TAIR10.44.gff3

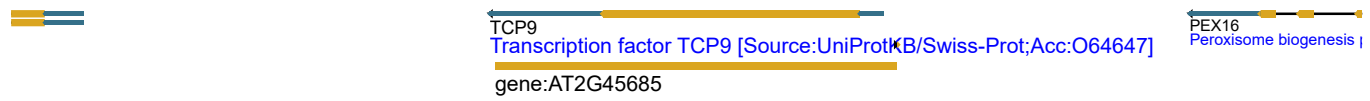

Supplement: TPJ-112-1070-s003.pdf [file TPJ-112-1070-s003.pdf]

(a)

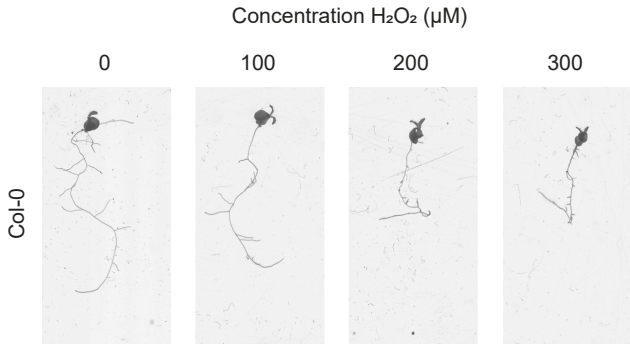

(b)

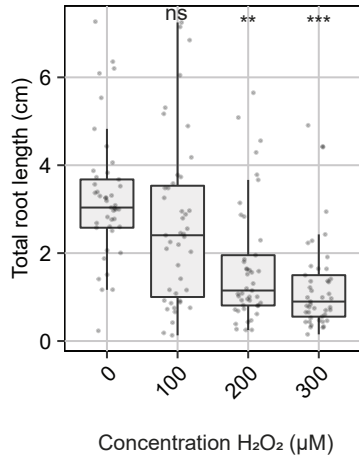

Supplement: TPJ-112-1070-s008.pdf [file TPJ-112-1070-s008.pdf]

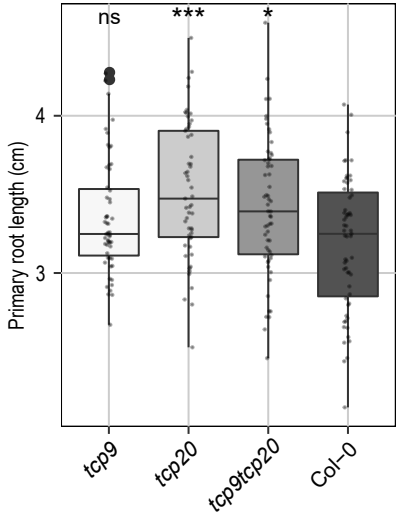

Supplement: TPJ-112-1070-s009.pdf [file TPJ-112-1070-s009.pdf]
